# Supplementary material for: Defective COX1 expression in aging mice liver
Source: PubMed Central journal article supplement (PMC10003073; doi:10.1242/bio.059844), 2023-03-02
Supplement: biolopen-12-059844-s1.pdf [file biolopen-12-059844-s1.pdf]

### **Table S1. Key Resource Table**

[Click here to download Table S1](#)

### **Table S2. Mapped Transcript Counts**

[Click here to download Table S2](#)
